# Supplementary material for: Optimization of Molecular Methods for Detecting Duckweed-Associated Bacteria
Source: MDPI journal article supplement (doi:10.3390/plants12040872), 2023-02-15
Supplement: s1 [file s1]

**A**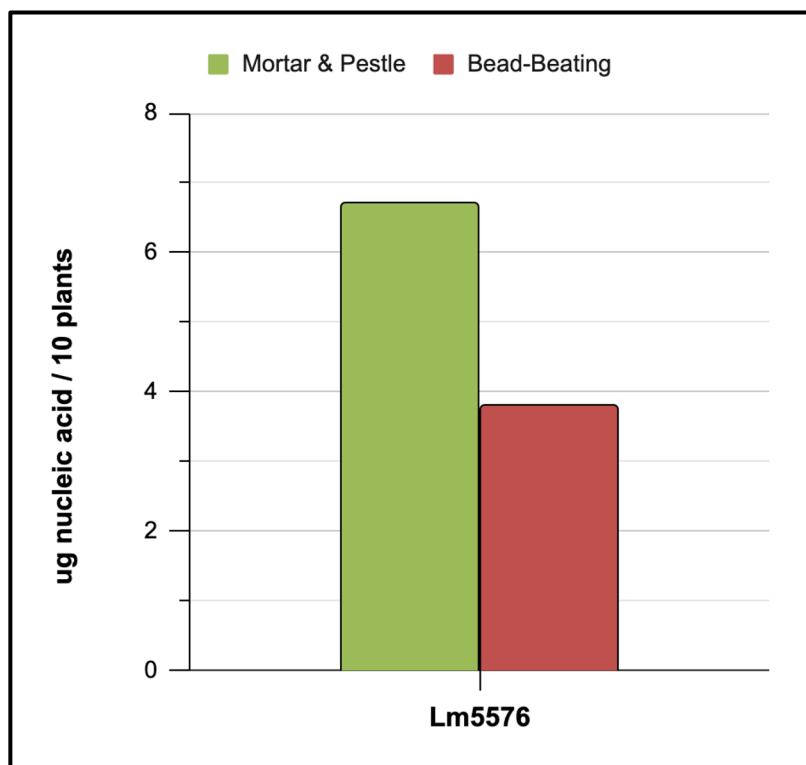**B**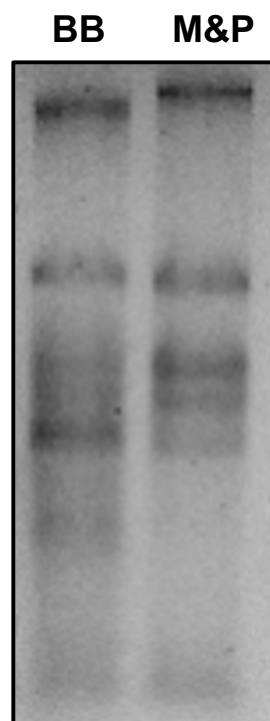**C**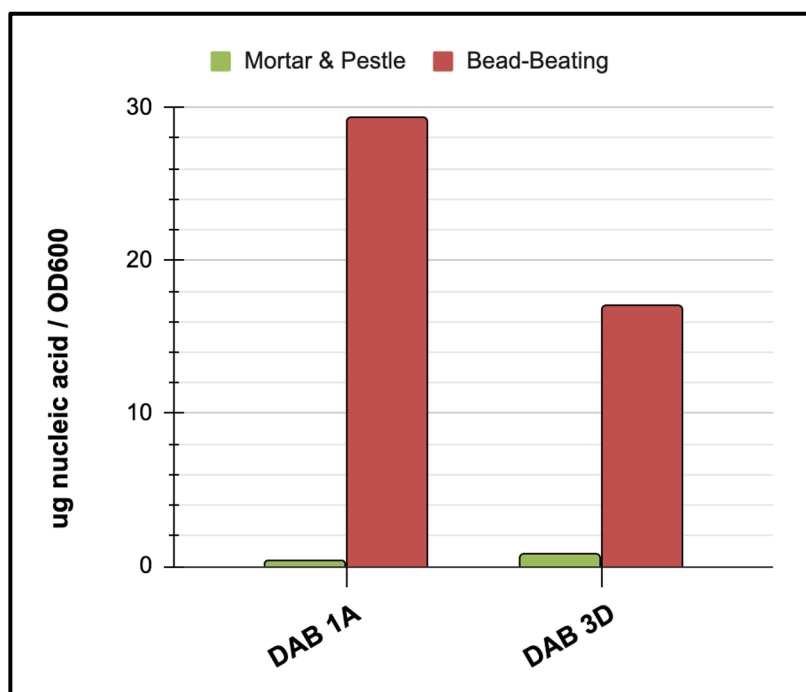**D**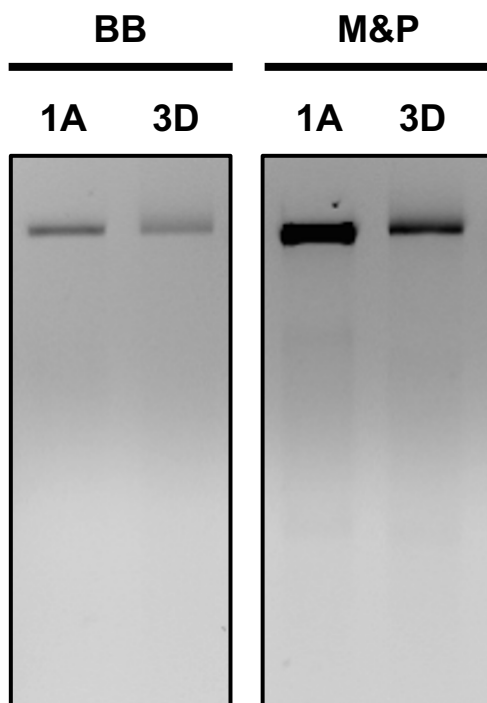**Figure S1**

**A**

|        |    |     |   |     |       |        |
|--------|----|-----|---|-----|-------|--------|
| 100 um | 1g | -   | - | 1 g | 0.5 g | 0.75 g |
| 1.7 mm | -  | 1 g | - | -   | 0.5 g | 0.25 g |
| 4 mm   | -  | -   | 1 | 1   | 1     | -      |

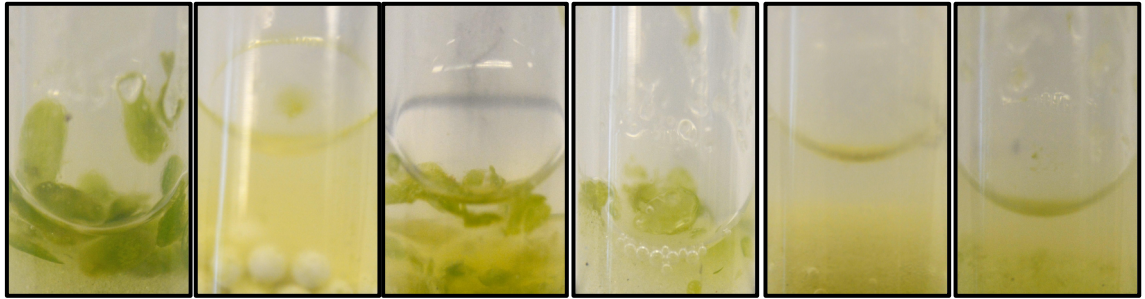**B**

M 0.1 1.7 4

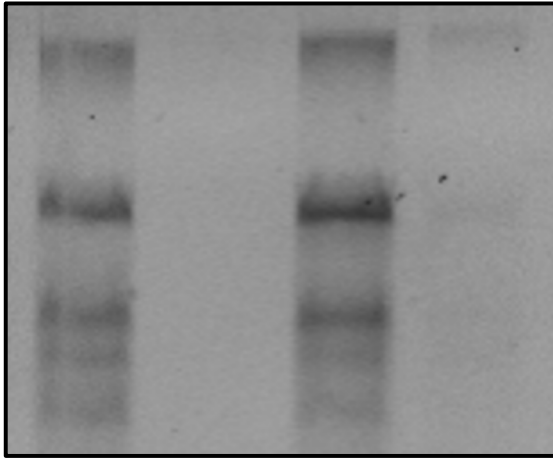**C**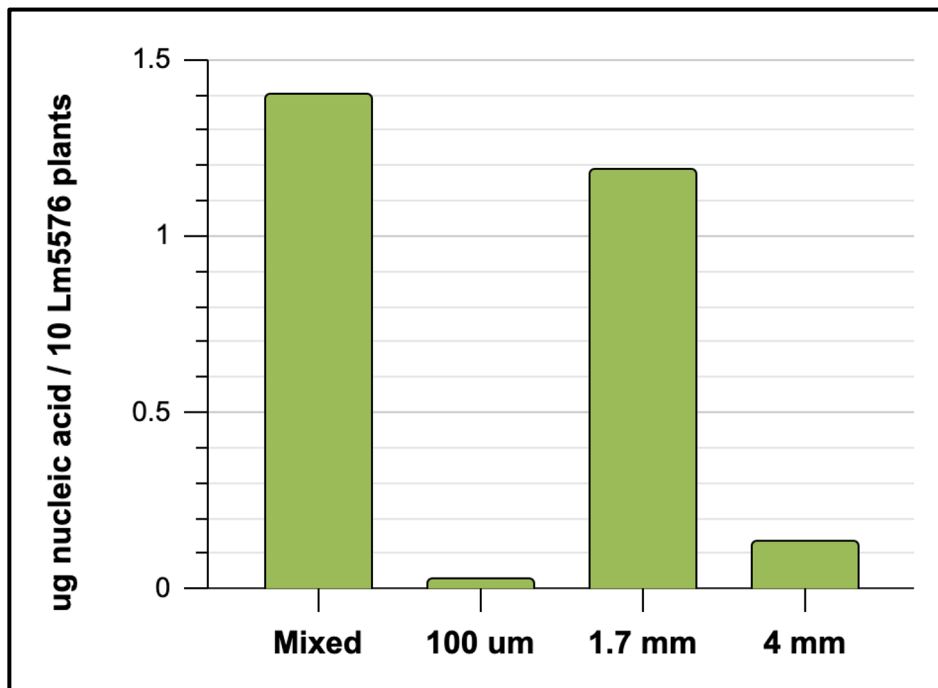**Figure S2**

**A**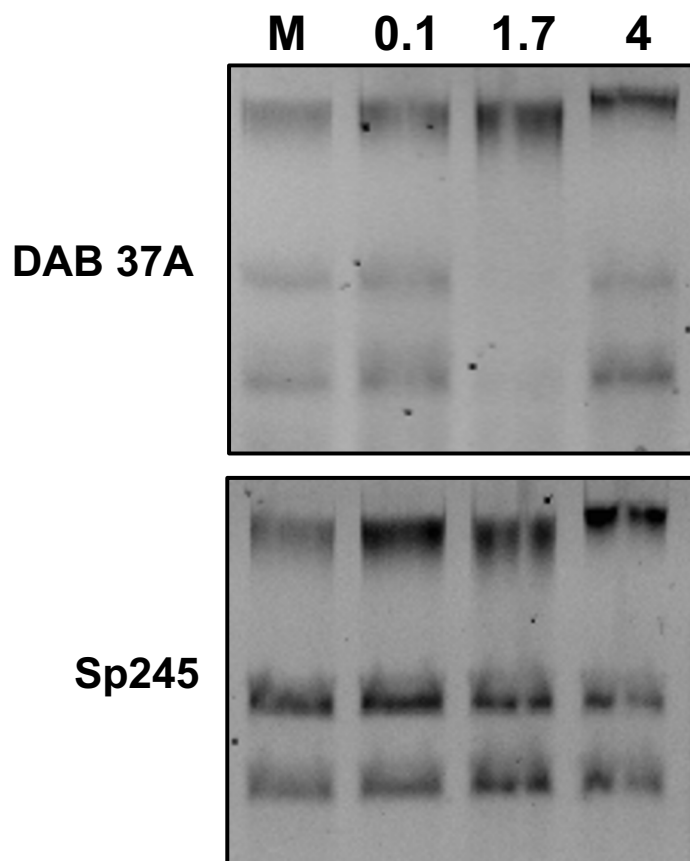**B**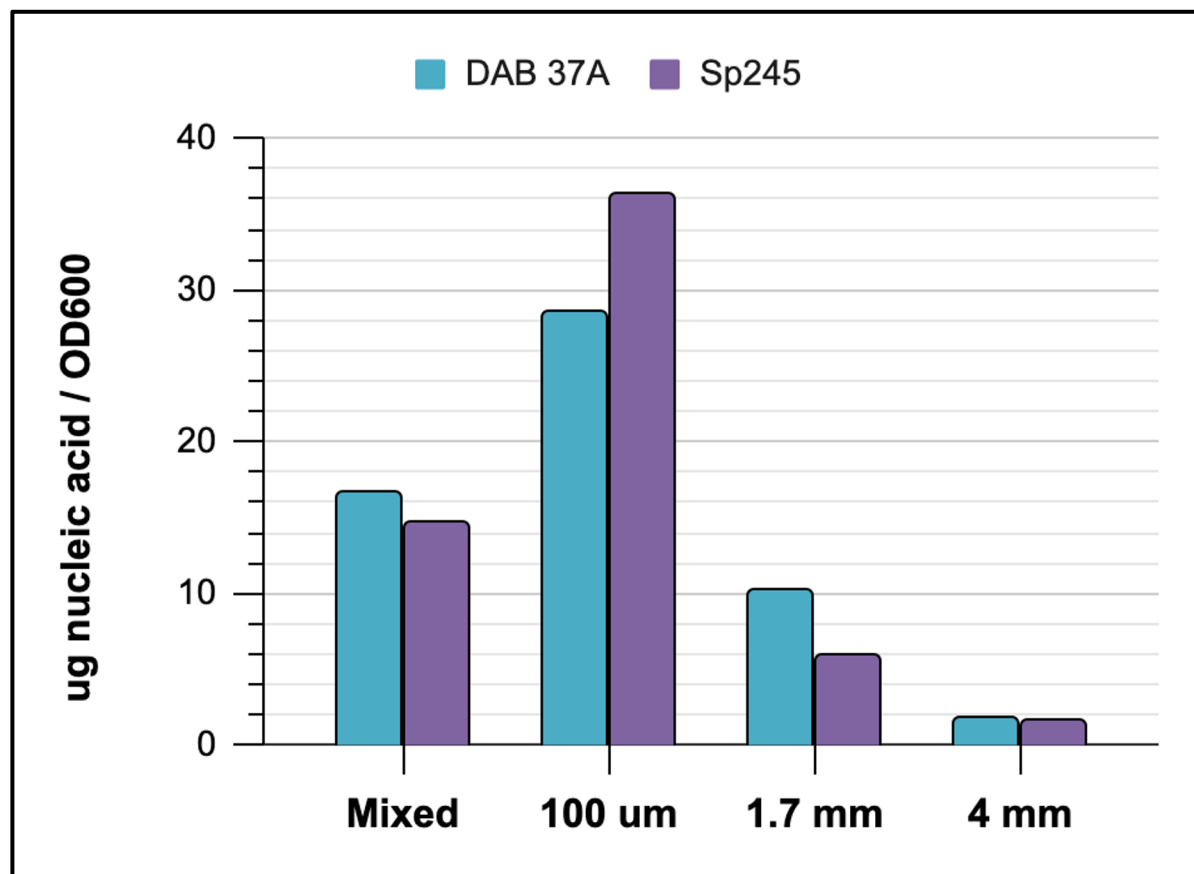**Figure S3**

**A**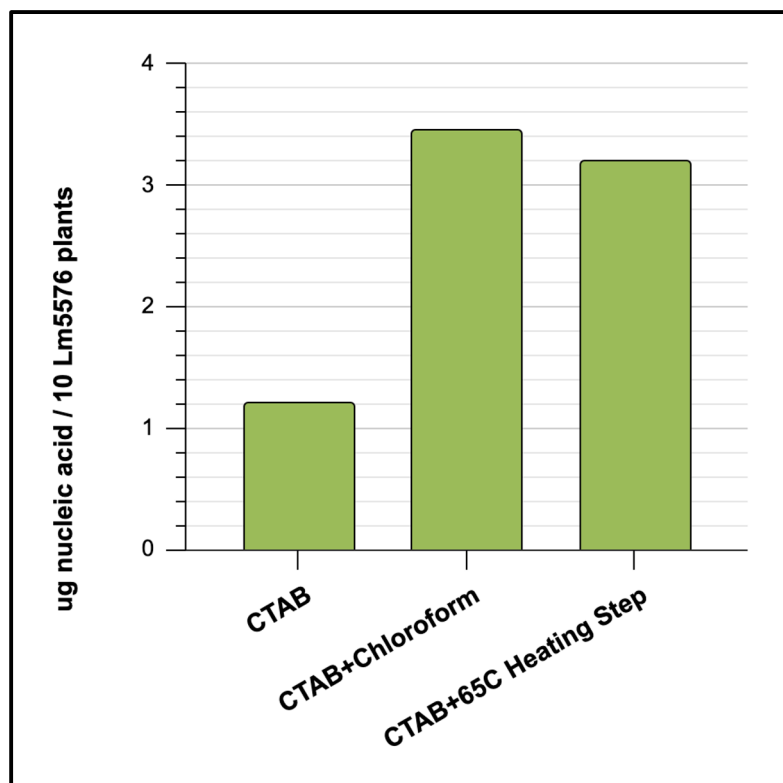**B**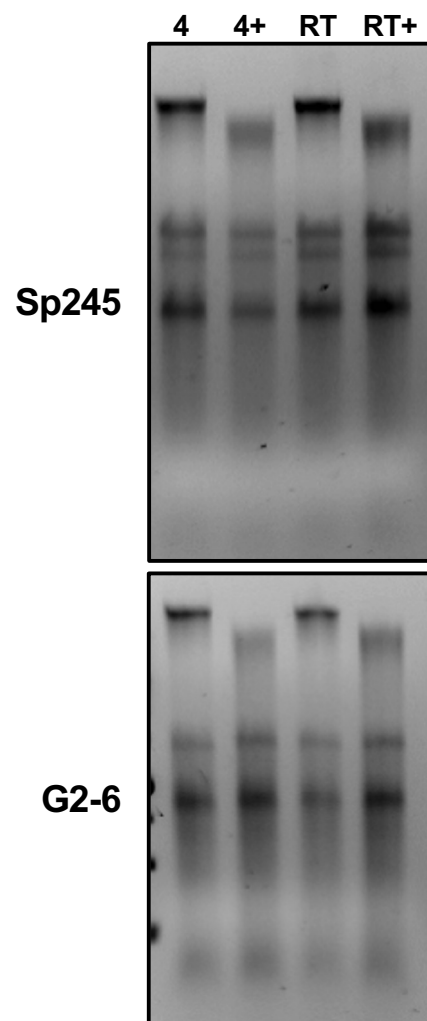**C**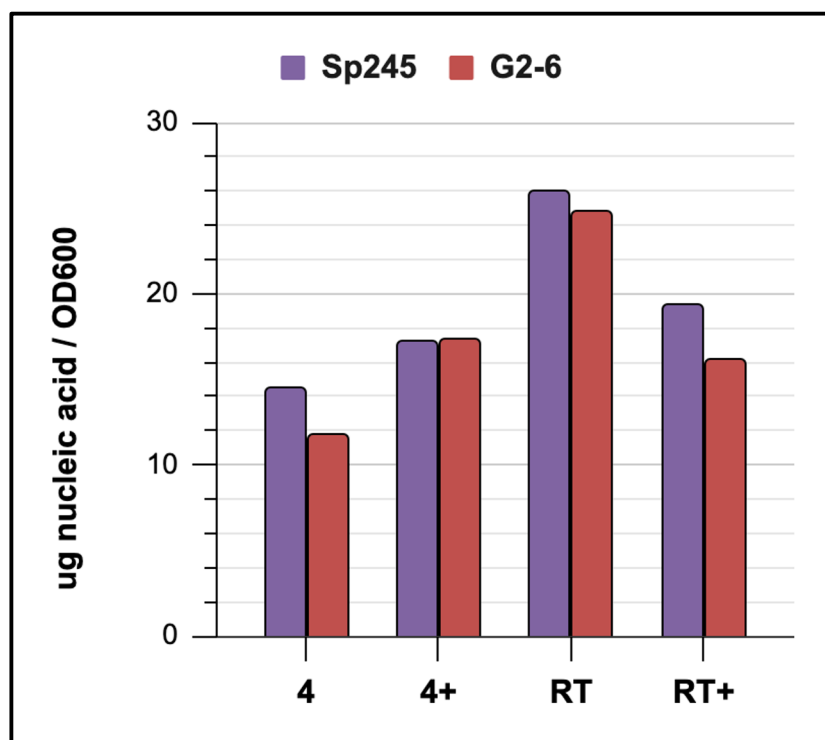**Figure S4**

**A** **B**

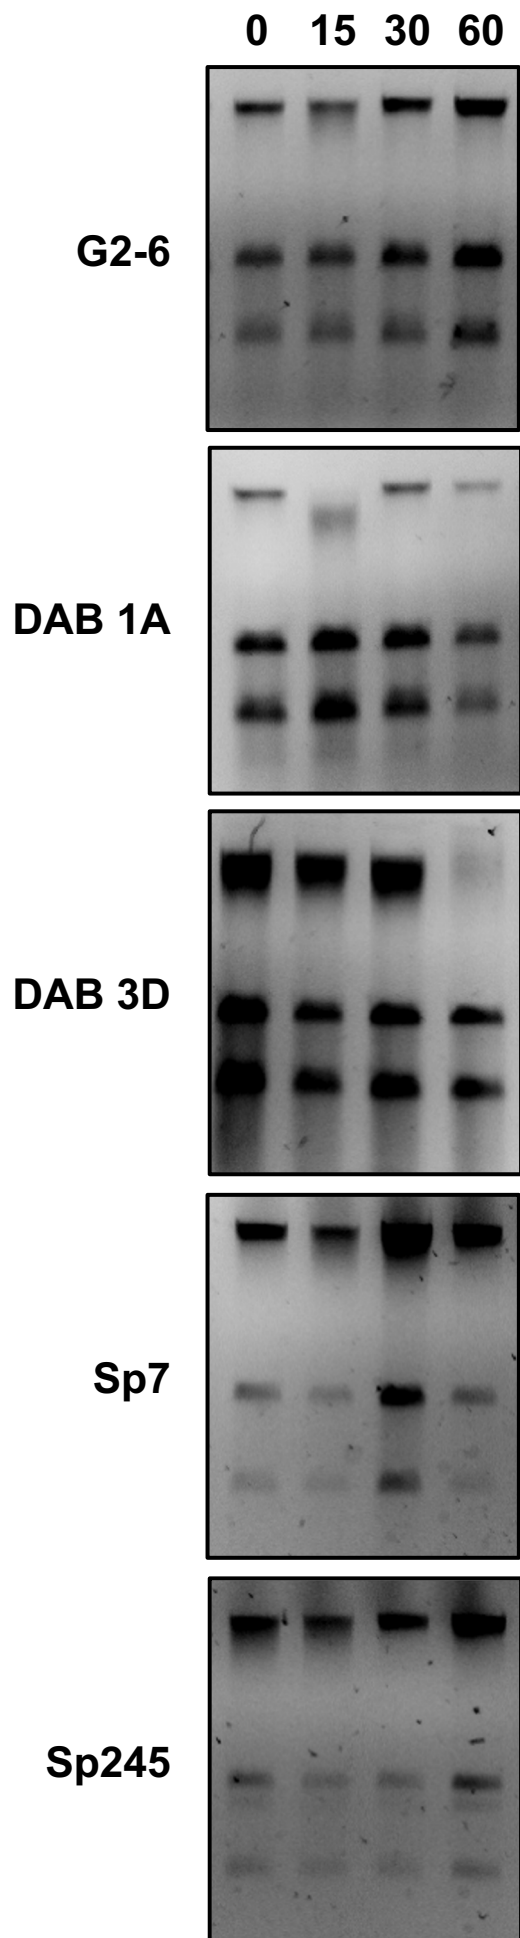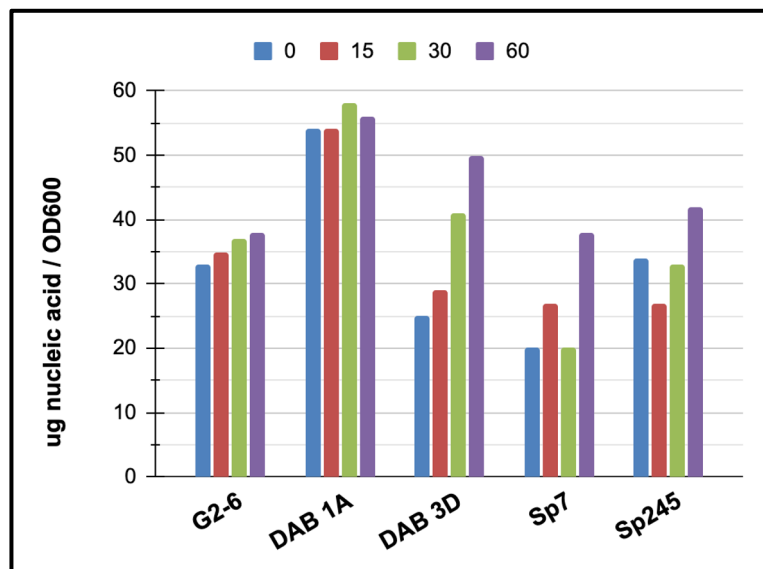

**Figure S5**

**A**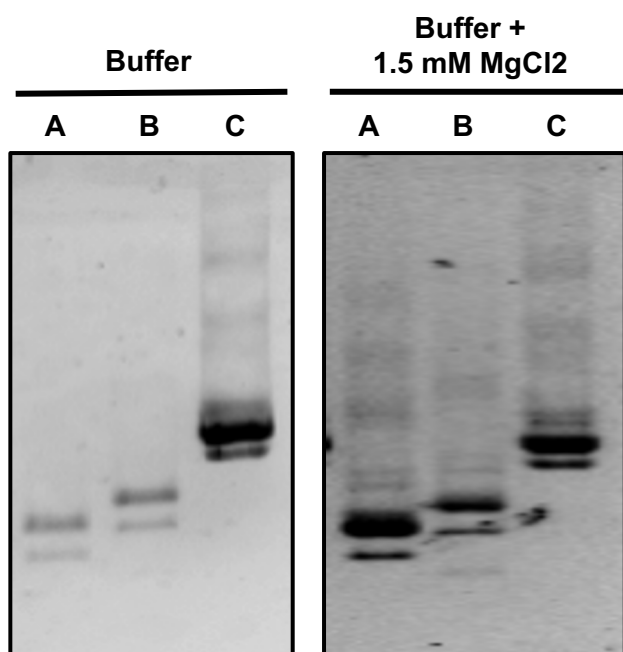**C**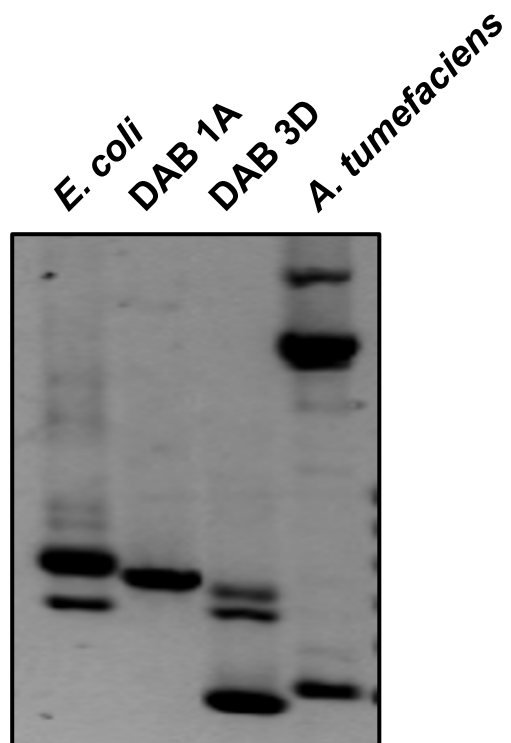**B**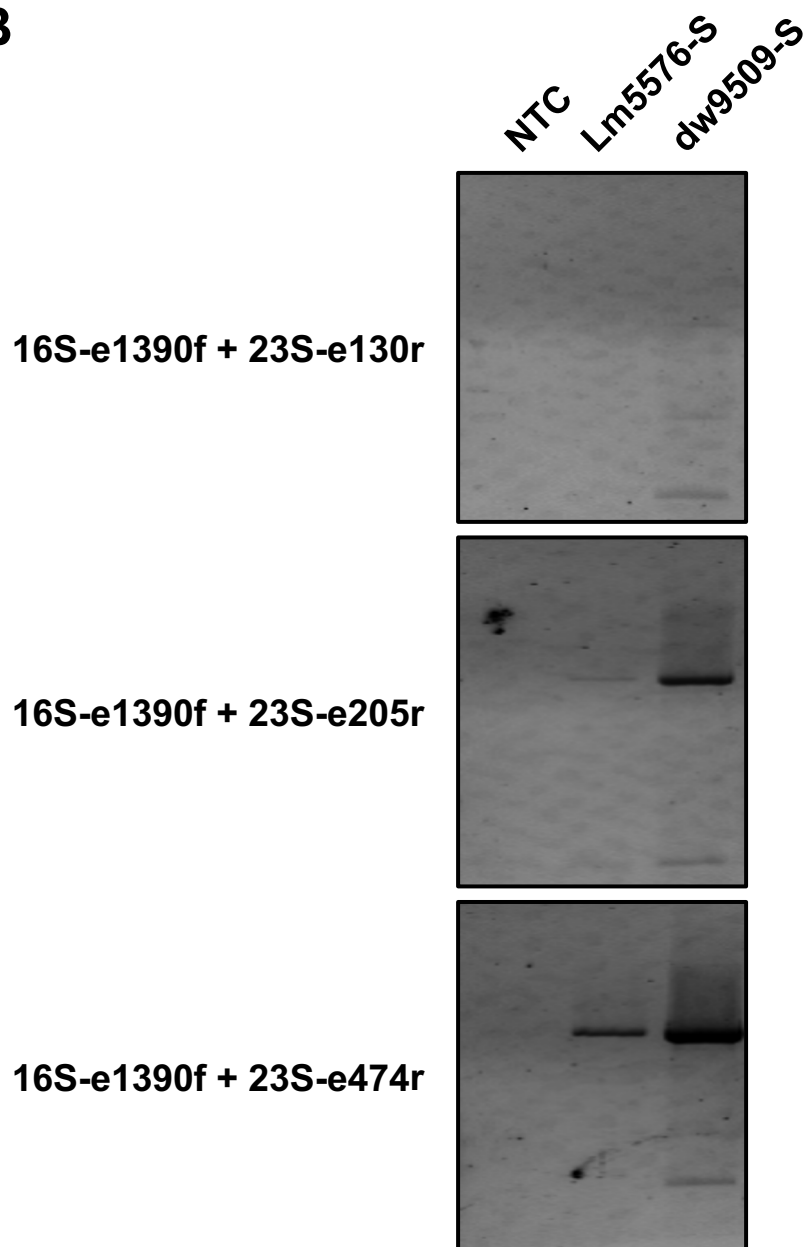**Figure S6**

**A**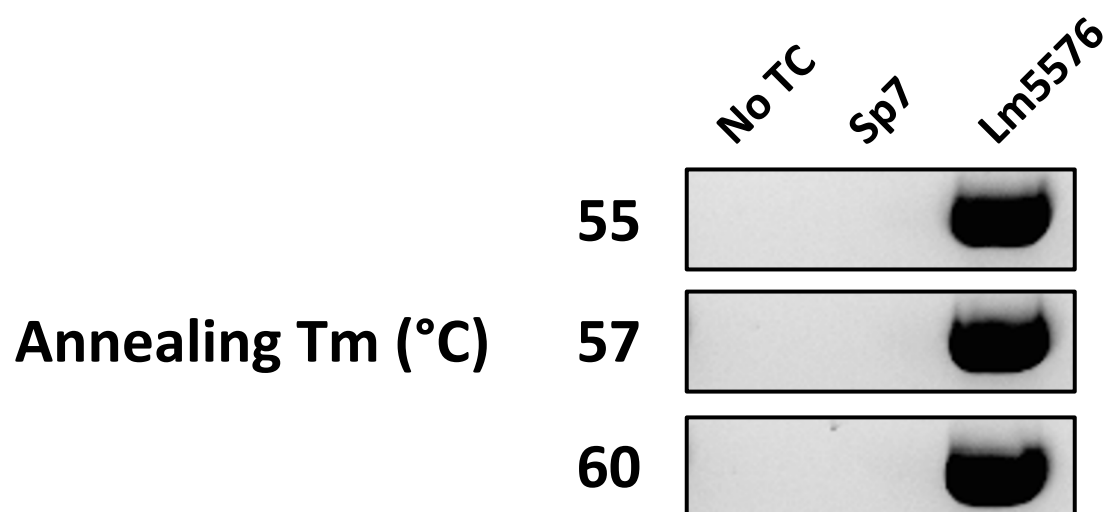**B**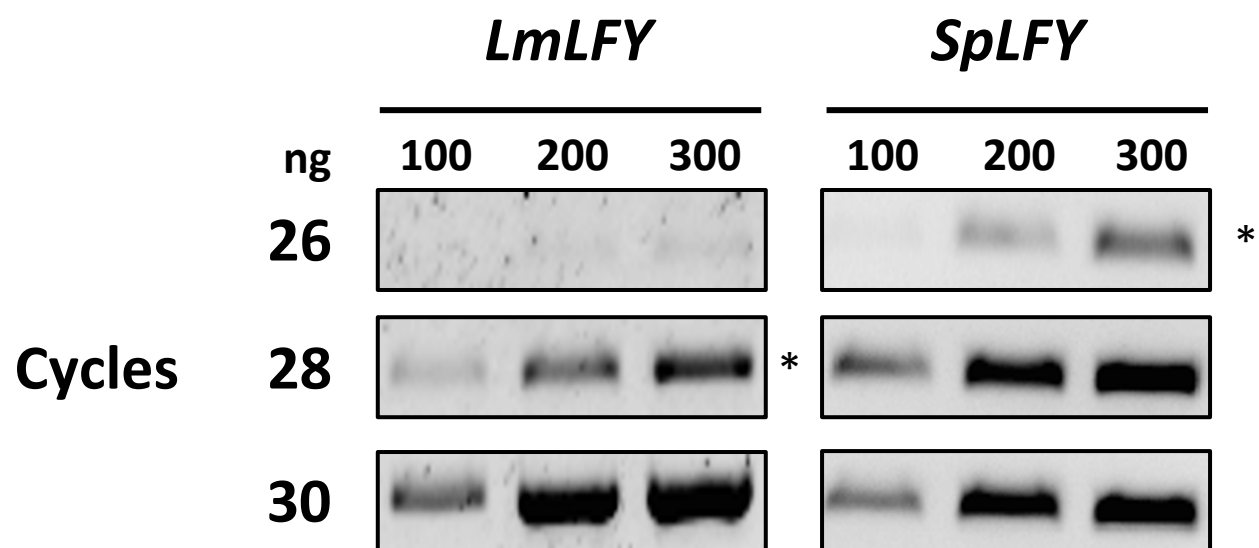**Figure S7**

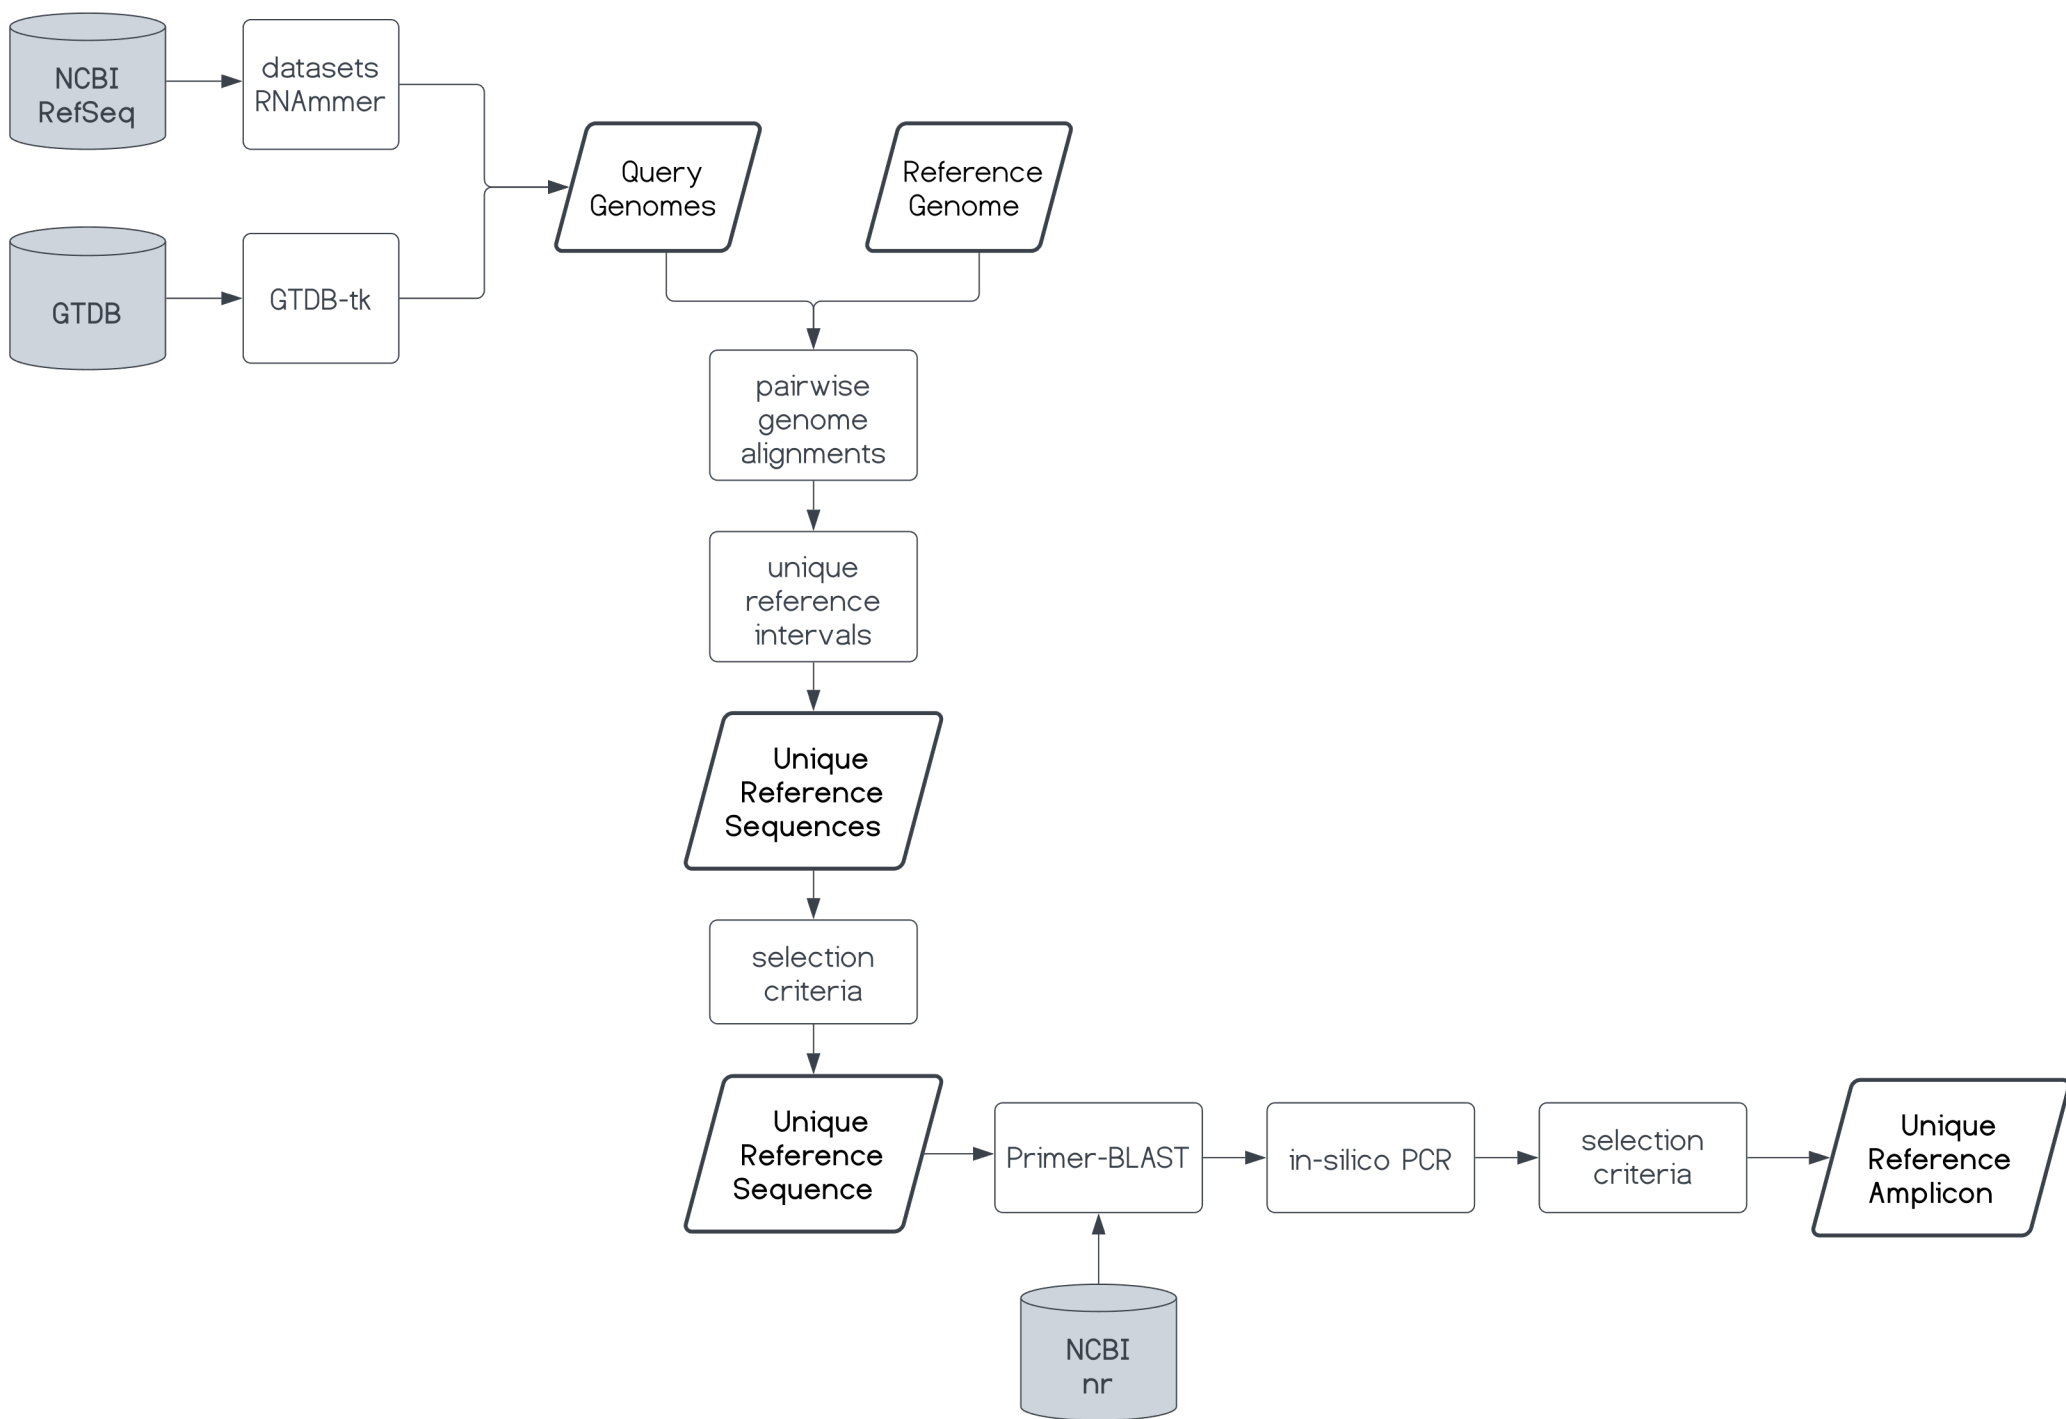

**Figure S8**
